# Supplementary material for: Inference of Causal Relationships Between Genetic Risk Factors for Cardiometabolic Phenotypes and Female‐Specific Health Conditions
Source: PubMed Central journal article supplement — J Am Heart Assoc. 2023 Feb 27;12(5):e026561. doi: 10.1161/JAHA.121.026561 (PMC10111435; doi:10.1161/jaha.121.026561), 2023-02-27
Supplement: JAH3-12-e026561-s001.pdf [file JAH3-12-e026561-s001.pdf]

# **SUPPLEMENTAL MATERIAL**

**Table S1.** ICD codes used to determine cases and controls for cardiometabolic and female health phenotypes

| Phenotype                         | Cases                                                                                                                                                                                           | Controls                                                                                                                        |
|-----------------------------------|-------------------------------------------------------------------------------------------------------------------------------------------------------------------------------------------------|---------------------------------------------------------------------------------------------------------------------------------|
| <i>Cardiometabolic Phenotypes</i> |                                                                                                                                                                                                 |                                                                                                                                 |
| Coronary Artery Disease           | 414.0*, I25.1*                                                                                                                                                                                  | Females without codes from cases                                                                                                |
| Hypertension                      | 401*, I10*                                                                                                                                                                                      | Females without codes from cases                                                                                                |
| Type 2 Diabetes                   | 250*, E11*                                                                                                                                                                                      | Females without codes from cases                                                                                                |
| <i>Women's Health Phenotypes</i>  |                                                                                                                                                                                                 |                                                                                                                                 |
| Placenta abruption, previa        | O44.*, O45.*, 641.0, 641.1, 641.2, 667, 762.0, 762.1, 762.2                                                                                                                                     | Z32.01, O80.*, 650, V72.42 (ICD-9)but no code 632.* or O02.* and no codes from cases                                            |
| Gestational Hypertension          | O13.*, 642.4, 642.5, 642.6, 642.7                                                                                                                                                               | Z32.01, O80.*, 650, V72.42 (ICD-9), O09.*, V23.*(ICD-9), Z33.1, V22.2 (ICD-9)but no code 632.* or O02.* and no codes from cases |
| PreEclampsia                      | O14.*, O11.*, 642.4, 642.5, 642.6, 642.7                                                                                                                                                        | Z32.01, O80.*, 650, V72.42 (ICD-9), O09.*, V23.*(ICD-9), Z33.1, V22.2 (ICD-9)but no code 632.* or O02.* and no codes from cases |
| Poor fetal growth                 | O36.5*                                                                                                                                                                                          | Females with codes O80.*, 650.* but not the code in cases                                                                       |
| Excessive fetal growth            | O36.6*, 656.6, 656.60, 656.63, 656.61                                                                                                                                                           | Females with codes O80.*, 650.* but not the code in cases                                                                       |
| Intrauterine Death                | 656.4, 656.41, 656.43, O31.2, O36.4, O36.4XX0, O36.4XX1, O36.4XX2, O36.4XX3, O36.4XX4, O36.4XX5, O36.4XX9, 656.4, 656.41, 656.43 but not with any of codes O35.9XX0, Q95.0, Q95.1, Q95.8, Q95.9 | Females with codes O80.*, 650.* but not the code in cases                                                                       |
| Stillbirth                        | P95, Z37.1, V27.1 (ICD-10), V27.4 (ICD-10), Z37.4, V27.7(ICD-10), V35 (ICD-9) Z37.7 but not with any of codes O35.9XX0, Q95.0, Q95.1, Q95.8, Q95.9                                              | Females with codes O80.*, 650.* but not the code in cases also no code Z35.208                                                  |

|                             |                                                                                                                                           |                                                                                                                                                                                    |
|-----------------------------|-------------------------------------------------------------------------------------------------------------------------------------------|------------------------------------------------------------------------------------------------------------------------------------------------------------------------------------|
| Gestational Diabetes        | O24.*, 648.8*                                                                                                                             | Z32.01, O80.*, 650, V72.42 (ICD-9), O09.*, V23.*(ICD-9), Z33.1, V22.2 (ICD-9) but no code 632.* or O02.* and no codes from cases                                                   |
| Ectopic Pregnancy           | 633.*, O00.*, V32.42(ICD-9), 761.4, O08.105, O08.806, O08.006, O008.104, O009, P01.4, CPT-codes: 59130, 59140, 59135, 59136, 59120, 59121 | Z32.01, O80.*, 650, V72.42 (ICD-9), O09.*, V23.*(ICD-9), Z33.1, V22.2 (ICD-9)but no code 632.* or O02.* and no codes from cases and no codes O09.1, O09.11, O09.12, O09.13, O09.10 |
| Miscarriage                 | 632, O02.1, O31.10X0 but not with any of codes O35.9XX0, Q95.0, Q95.1, Q95.8, Q95.9                                                       | Z32.01, O80.*, 650, V72.42 (ICD-9), O09.*, V23.*(ICD-9), Z33.1, V22.2 (ICD-9)but no codes from cases                                                                               |
| Uterine fibroid             | D25.9, 218.9                                                                                                                              | Females without codes from cases                                                                                                                                                   |
| Endometriosis               | N80.*, 617.*                                                                                                                              | Females without codes from cases                                                                                                                                                   |
| Polycystic Ovarian Syndrome | E28.2, 256.4                                                                                                                              | Females without codes from cases                                                                                                                                                   |
| Breast Cancer               | C50.*, 174, 175, 233.0                                                                                                                    | Females without codes from cases                                                                                                                                                   |
| Vulvar Cancer               | C51.*, 184.4                                                                                                                              | Females without codes from cases                                                                                                                                                   |
| Vaginal Cancer              | C52.*, 184.0                                                                                                                              | Females without codes from cases                                                                                                                                                   |
| Cervical Cancer             | C53.*, 180.*                                                                                                                              | Females without codes from cases                                                                                                                                                   |
| Endometrial cancer          | C54.*, 182.*                                                                                                                              | Females without codes from cases                                                                                                                                                   |
| Uterine cancer              | C55.*, 179                                                                                                                                | Females without codes from cases                                                                                                                                                   |
| Ovarian Cancer              | C56.*, 183, 186, 220, 220.0                                                                                                               | Females without codes from cases                                                                                                                                                   |
| Postpartum depression       | F53.*, O90.6, 648.4*                                                                                                                      | Females with codes O80.*, 650.* but not the code in cases                                                                                                                          |
| Preterm birth               | O60.1*, 644.765                                                                                                                           | Females with codes O80.*, 650.* but not the code in cases                                                                                                                          |
| Postpartum hemorrhage       | O72.*, 666.0, 666.1, 666.2                                                                                                                | Females with codes O80.*, 650.* but not the code in cases                                                                                                                          |

**Table S2.** Publicly available female health condition GWAS used in two-sample MR

| <b>Phenotype</b>            | <b>Ancestry</b> | <b>Source</b>    | <b>Sample Size (N cases)</b> | <b>Reference or PMID</b>                                    |
|-----------------------------|-----------------|------------------|------------------------------|-------------------------------------------------------------|
| Breast Cancer               | EUR             | BCAC             | 33832 (15748)                | 25751625                                                    |
| Endometrial Cancer          | EUR             | ECAC, E2C2, UKBB | 121885 (12906)               | 30093612                                                    |
| Gestational Diabetes        | EUR             | FinnGen          | 116363 (6033)                | <a href="https://r5.finngen.fi/">https://r5.finngen.fi/</a> |
| Gestational Hypertension    | EUR             | FinnGen          | 118990 (4255)                | <a href="https://r5.finngen.fi/">https://r5.finngen.fi/</a> |
| Preeclampsia                | EUR             | FinnGen          | 123579 (8844)                | <a href="https://r5.finngen.fi/">https://r5.finngen.fi/</a> |
| Polycystic Ovarian Syndrome | EUR             | FinnGen          | 118870 (642)                 | <a href="https://r5.finngen.fi/">https://r5.finngen.fi/</a> |
| Postpartum Depression       | EUR             | FinnGen          | 67205 (7604)                 | <a href="https://r5.finngen.fi/">https://r5.finngen.fi/</a> |

**Table S3.** PGS performance on cardiometabolic phenotypes in PMBB using LD panels of different ancestries

| PRS | LD Panel | R <sup>2</sup> /AUC in PMBB All | R <sup>2</sup> /AUC in PMBB EUR | R <sup>2</sup> /AUC in PMBB AFR |
|-----|----------|---------------------------------|---------------------------------|---------------------------------|
| BMI | Multi    | 0.1542                          | 0.07977                         | 0.03556                         |
|     | EUR      | 0.1528                          | 0.7888                          | 0.3381                          |
|     | AFR      | 0.1538                          | 0.07575                         | 0.03663                         |
| CAD | Multi    | 0.8235                          | 0.8303                          | 0.799                           |
|     | EUR      | 0.8237                          | 0.8303                          | 0.7992                          |
|     | AFR      | 0.8238                          | 0.8303                          | 0.7994                          |
| DBP | Multi    | 0.0425                          | 0.01555                         | 0.04545                         |
|     | EUR      | 0.0412                          | 0.01425                         | 0.04429                         |
|     | AFR      | 0.0427                          | 0.01564                         | 0.04597                         |
| PP  | Multi    | 0.8125                          | 0.7797                          | 0.839                           |
|     | EUR      | 0.8123                          | 0.7796                          | 0.8387                          |
|     | AFR      | 0.8124                          | 0.7795                          | 0.839                           |
| SBP | Multi    | 0.8144                          | 0.7817                          | 0.8416                          |
|     | EUR      | 0.8143                          | 0.7818                          | 0.8413                          |
|     | AFR      | 0.8144                          | 0.7815                          | 0.8415                          |
| T2D | Multi    | 0.754                           | 0.7133                          | 0.7366                          |
|     | EUR      | 0.7544                          | 0.7148                          | 0.7364                          |
|     | AFR      | 0.7529                          | 0.7089                          | 0.7369                          |

**Table S4.** Direct tests for pleiotropy using MR Egger for two-sample Mendelian randomization

| <b>Exposure</b> | <b>Outcome</b>              | <b>Intercept</b> | <b>SE</b> | <b>P value</b> |
|-----------------|-----------------------------|------------------|-----------|----------------|
| BMI             | Breast Cancer               | 0.015            | 0.0056    | 0.0089         |
|                 | Endometrial Cancer          | 0.0033           | 0.0064    | 0.6            |
|                 | Gestational Diabetes        | 0.035            | 0.011     | 0.0016         |
|                 | Polycystic Ovarian Syndrome | -0.0048          | 0.03      | 0.88           |
| CAD             | Breast Cancer               | 0.0025           | 0.0026    | 0.34           |
| PP              | Gestational Hypertension    | 0.009            | 0.0094    | 0.338          |
|                 | Preeclampsia                | 0.0034           | 0.0075    | 0.66           |
| SBP             | Gestational Hypertension    | -7.86E-05        | 0.013     | 0.99           |
|                 | Preeclampsia                | -0.002           | 0.0093    | 0.83           |
| T2D             | Breast Cancer               | 0.00035          | 0.0016    | 0.83           |
|                 | Gestational Diabetes        | 0.0021           | 0.0033    | 0.53           |
|                 | Gestational Hypertension    | 0.011            | 0.0027    | 9.61E-05       |
|                 | Polycystic Ovarian Syndrome | 0.01             | 0.007     | 0.14           |
|                 | Postpartum Depression       | 0.0037           | 0.0021    | 0.082          |

**Table S5.** Two-sample Mendelian randomization using female-specific health conditions as exposures and cardiometabolic phenotypes as outcomes

| Exposure                    | Outcome | Method          | Beta   | SE     | P value  |
|-----------------------------|---------|-----------------|--------|--------|----------|
| Breast Cancer               | BMI     | IVW             | -0.024 | 0.023  | 0.3      |
|                             |         | Weighted median | -0.01  | 0.012  | 0.39     |
|                             |         | MR Egger        | 0.028  | 0.06   | 0.64     |
|                             | CAD     | IVW             | 0.0095 | 0.01   | 0.34     |
|                             |         | Weighted median | 0.014  | 0.013  | 0.27     |
|                             |         | MR Egger        | 0.0084 | 0.023  | 0.72     |
|                             | T2D     | IVW             | 0.0023 | 0.17   | 0.89     |
|                             |         | Weighted median | 0.0011 | 0.009  | 0.91     |
|                             |         | MR Egger        | 0.026  | 0.039  | 0.51     |
| Endometrial Cancer          | BMI     | IVW             | 0.034  | 0.022  | 0.13     |
|                             |         | Weighted median | 0.03   | 0.018  | 0.1      |
|                             |         | MR Egger        | 0.021  | 0.12   | 0.87     |
| Gestational Diabetes        | BMI     | IVW             | -0.021 | 0.022  | 0.37     |
|                             |         | Weighted median | 0.0096 | 0.01   | 0.35     |
|                             |         | MR Egger        | 0.0037 | 0.0099 | 0.71     |
|                             | T2D     | IVW             | 0.2    | 0.049  | 3.00E-05 |
|                             |         | Weighted median | 0.12   | 0.011  | 3.00E-31 |
|                             |         | MR Egger        | 0.13   | 0.11   | 0.26     |
| Polycystic Ovarian Syndrome | T2D     | Wald ratio      | -0.01  | 0.016  | 0.51     |
| Preeclampsia                | PP      | IVW             | 0.91   | 0.27   | 0.00065  |
|                             |         | Weighted median | 0.84   | 0.25   | 0.00093  |
|                             |         | MR Egger        | 5.75   | 4      | 0.39     |

|  |     |                 |      |      |          |
|--|-----|-----------------|------|------|----------|
|  | SBP | IVW             | 3.46 | 0.65 | 1.12E-07 |
|  |     | Weighted median | 3.41 | 0.41 | 6.06E-17 |
|  |     | MR Egger        | 7.5  | 14.9 | 0.7      |

\*No SNPs were left after filtering for genome-wide significance and pruning for the postpartum depression GWAS. PCOS had no overlapping SNPs with the BMI GWAS. SNPs could not be extracted for the gestational hypertension GWAS.

\*\*Wald ratio was used for the PCOS and T2D MR since there was only one genome-wide significant SNP in the PCOS GWAS.

**Table S6.** Mean F-statistic of SNPs used in each two-sample MR analysis

| <b>Exposure</b> | <b>Outcome</b>              | <b>Mean F-statistic</b> |
|-----------------|-----------------------------|-------------------------|
| BMI             | Breast Cancer               | 64.968                  |
|                 | Endometrial Cancer          | 64.968                  |
|                 | Gestational Diabetes        | 64.775                  |
|                 | Polycystic Ovarian Syndrome | 64.775                  |
| CAD             | Breast Cancer               | 67.841                  |
| PP              | Gestational Hypertension    | 57.511                  |
|                 | Preeclampsia                | 57.511                  |
| SBP             | Gestational Hypertension    | 57.848                  |
|                 | Preeclampsia                | 57.848                  |
| T2D             | Breast Cancer               | 84.601                  |
|                 | Gestational Diabetes        | 83.931                  |
|                 | Gestational Hypertension    | 83.931                  |
|                 | Polycystic Ovarian Syndrome | 83.931                  |

**Table S7.** PRS PC associations in PMBB and eMERGE

| <b>PRS</b>    | <b>Group</b> | <b>R<sup>2</sup></b> |
|---------------|--------------|----------------------|
| <i>eMERGE</i> |              |                      |
| BMI           | All          | 0.503                |
|               | EUR          | 0.0727               |
|               | AFR          | 0.27                 |
| CAD           | All          | 0.11                 |
|               | EUR          | 0.0156               |
|               | AFR          | 0.0361               |
| DBP           | All          | 0.352                |
|               | EUR          | 0.135                |
|               | AFR          | 0.182                |
| PP            | All          | 0.346                |
|               | EUR          | 0.0469               |
|               | AFR          | 0.176                |
| SBP           | All          | 0.572                |
|               | EUR          | 0.271                |
|               | AFR          | 0.395                |
| T2D           | All          | 0.598                |
|               | EUR          | 0.174                |
|               | AFR          | 0.374                |
| <i>PMBB</i>   |              |                      |
| BMI           | All          | 0.602                |
|               | EUR          | 0.00334              |
|               | AFR          | 0.227                |

|     |     |        |
|-----|-----|--------|
| CAD | All | 0.163  |
|     | EUR | 0.0106 |
|     | AFR | 0.0158 |
| DBP | All | 0.451  |
|     | EUR | 0.0423 |
|     | AFR | 0.102  |
| PP  | All | 0.517  |
|     | EUR | 0.0117 |
|     | AFR | 0.16   |
| SBP | All | 0.58   |
|     | EUR | 0.0284 |
|     | AFR | 0.198  |
| T2D | All | 0.647  |
|     | EUR | 0.0428 |
|     | AFR | 0.292  |

**Table S8.** One-sample Mendelian randomization using only PRS with no other covariates

| Exposure | Outcome                     | Group   | Beta     | SE       | P value  |
|----------|-----------------------------|---------|----------|----------|----------|
| BMI      | Breast Cancer               | All     | -0.00737 | 0.0027   | 0.00629  |
|          | Endometrial Cancer          | All     | 6.94E-07 | 0.000402 | 0.999    |
|          |                             | EUR     | 0.0014   | 0.000362 | 0.000112 |
|          | Gestational Diabetes        | All     | 0.0097   | 0.00731  | 0.185    |
|          |                             | EUR     | 0.0144   | 0.00373  | 0.000108 |
|          | Polycystic Ovarian Syndrome | All     | 0.00264  | 0.000678 | 9.79E-05 |
| EUR      |                             | 0.00275 | 0.000387 | 1.18E-12 |          |
| CAD      | Breast Cancer               | All     | -0.427   | 0.0451   | 3.24E-21 |
|          |                             | EUR     | -0.2     | 0.0356   | 1.75E-08 |
|          | Postpartum Depression       | EUR     | 2.62     | 1.61     | 0.104    |
| HT (PP)  | Gestational Hypertension    | All     | 0.911    | 0.564    | 0.106    |
|          |                             | EUR     | 1.73     | 0.671    | 0.00976  |
|          | Preeclampsia                | All     | 0.915    | 0.369    | 0.0132   |
| SBP      | Gestational Hypertension    | All     | 0.743    | 0.287    | 0.00978  |
|          |                             | EUR     | 0.987    | 0.432    | 0.0223   |
|          |                             | AFR     | 0.722    | 0.296    | 0.0149   |
|          | Preeclampsia                | All     | 0.779    | 0.0176   | 9.35E-06 |
|          |                             | EUR     | 0.637    | 0.165    | 0.000119 |
|          |                             | AFR     | 0.853    | 0.314    | 0.00658  |
| T2D      | Breast Cancer               | All     | -0.182   | 0.0506   | 0.000315 |
|          |                             | EUR     | -0.114   | 0.0223   | 3.06E-07 |
|          | Gestational Diabetes        | All     | 1.05     | 0.165    | 2.11E-10 |
|          |                             | EUR     | 1.59     | 0.252    | 2.59E-10 |

|                             |     |        |         |          |
|-----------------------------|-----|--------|---------|----------|
| Gestational Hypertension    | All | 0.976  | 0.251   | 0.000102 |
|                             | EUR | 0.865  | 0.272   | 0.00146  |
| Polycystic Ovarian Syndrome | All | 0.058  | 0.00717 | 5.67E-16 |
|                             | EUR | 0.0625 | 0.0108  | 5.95E-09 |
|                             | AFR | 0.0246 | 0.0244  | 0.312    |
| Postpartum Depression       | All | 1.33   | 0.77    | 0.0839   |

**Figure S1.** Genetic correlations between multi-ancestry cardiometabolic phenotypes and female-specific health conditions using European (left) and African (right) ancestry-derived GWASs



**Figure S2.** PRS<sub>BMI</sub> distribution (eMERGE on left and PMBB on right)



**Figure S3.** PRS<sub>CAD</sub> distribution (eMERGE on left and PMBB on right)



**Figure S4.** PRS<sub>DBP</sub> distribution (eMERGE on left and PMBB on right)



**Figure S5.** PRS<sub>PP</sub> distribution (eMERGE on left and PMBB on right)



**Figure S6.** PRS<sub>SBP</sub> distribution (eMERGE on left and PMBB on right)



**Figure S7.** PRS<sub>T2D</sub> distribution (eMERGE on left and PMBB on right)



**Figure S8.** Prevalence by PRS quintile plot ( $PRS_{BMI}$  and breast cancer and  $PRS_{BMI}$  and endometrial cancer)



**Figure S9.** Prevalence by PRS quintile plot ( $PRS_{BMI}$  and gestational diabetes and  $PRS_{BMI}$  and PCOS)



**Figure S10.** Prevalence by PRS quintile plot (PRS<sub>DBP</sub> and excessive fetal growth and PRS<sub>DBP</sub> and gestational hypertension)



**Figure S11.** Prevalence by PRS quintile plot (PRS<sub>PP</sub> and gestational hypertension and PRS<sub>PP</sub> and preeclampsia)



**Figure S12.** Prevalence by PRS quintile plot (PRS<sub>SBP</sub> and gestational hypertension and PRS<sub>SBP</sub> and preeclampsia)



**Figure S13.** Prevalence by PRS quintile plot (PRS<sub>T2D</sub> and breast cancer and PRS<sub>T2D</sub> and gestational diabetes)



**Figure S14.** Prevalence by PRS quintile plot (PRS<sub>T2D</sub> and gestational hypertension and PRS<sub>T2D</sub> and PCOS)



**Figure S15.** Chronological map for patients with high and low PRS<sub>CAD</sub>



**Figure S16.** Chronological map for patients with high and low PRS<sub>DBP</sub>



**Figure S17.** Chronological map for patients with high and low PRS<sub>PP</sub>



**Figure S18.** Chronological map for patients with high and low PRS<sub>SBP</sub>
